# Supplementary material for: Antenatal care services and its implications for vital and health outcomes of children: evidence from 193 surveys in 69 low-income and middle-income countries
Source: PubMed Central journal article supplement — BMJ Open. 2017 Nov 15;7(11):e017122. doi: 10.1136/bmjopen-2017-017122 (PMC5695442; doi:10.1136/bmjopen-2017-017122), 2017-11-15
Supplement: bmjopen-2017-017122supp001.pdf [file bmjopen-2017-017122supp001.pdf]

Table A1: Sample size and surveys across countries

|                              | Phase (Year of survey)                                                                       | No. obs.<br>(% of total) |
|------------------------------|----------------------------------------------------------------------------------------------|--------------------------|
| <b>Albania</b>               | Phase 5 (2008/09)                                                                            | 1,152<br>(0.15)          |
| <b>Armenia</b>               | Phase 4 (2000), Phase 5 (2005), Phase 6 (2010)                                               | 2,778<br>(0.37)          |
| <b>Azerbaijan</b>            | Phase 5 (2006)                                                                               | 1,174<br>(0.16)          |
| <b>Bangladesh</b>            | Phase 3 (1993/94, 1996, 1997)*, Phase 4 (1999, 2000)*, Phase 5 (2004, 2007)*, Phase 6 (2011) | 23,459<br>(3.12)         |
| <b>Benin</b>                 | Phase 3 (1996), Phase 4 (2001)*, Phase 5 (2006), Phase 6 (2011/12)                           | 16,274<br>(2.16)         |
| <b>Bolivia</b>               | Phase 3 (1993/94), Phase 4 (2003/04), Phase 5 (2008)                                         | 17,034<br>(2.26)         |
| <b>Brazil</b>                | Phase 2 (1991/92), Phase 3 (1996)                                                            | 5,339<br>(0.71)          |
| <b>Burkina Faso</b>          | Phase 2 (1992/93), Phase 4 (1998/99, 2003)*, Phase 6 (2010)                                  | 15,095<br>(2.01)         |
| <b>Burundi</b>               | Phase 6 (2010/11)                                                                            | 3,224<br>(0.43)          |
| <b>Cambodia</b>              | Phase 4 (2000), Phase 5 (2005/06), Phase 6 (2010/11)                                         | 14,645<br>(1.95)         |
| <b>Cameroon</b>              | Phase 2 (1991), Phase 3 (1998), Phase 4 (2004), Phase 6 (2011)                               | 10,344<br>(1.37)         |
| <b>Central Afr. Republic</b> | Phase 3 (1994/95)                                                                            | 1,451<br>(0.19)          |
| <b>Chad</b>                  | Phase 3 (1996/97), Phase 4 (2004)                                                            | 5,821<br>(0.77)          |
| <b>Colombia</b>              | Phase 3 (1995), Phase 5 (2004, 2005)*, Phase 6 (2009/10)                                     | 24,944<br>(3.31)         |
| <b>Comoros</b>               | Phase 3 (1996)                                                                               | 595<br>(0.08)            |
| <b>Congo (DRC)</b>           | Phase 5 (2007)                                                                               | 3,297<br>(0.44)          |
| <b>Congo (Brazzaville)</b>   | Phase 5 (2005), Phase 6 (2011/12)                                                            | 6,281<br>(0.83)          |
| <b>Dom. Republic</b>         | Phase 2 (1991), Phase 3 (1996), Phase 4 (2002), Phase 5 (2007)                               | 17,845<br>(2.37)         |
| <b>Egypt</b>                 | Phase 2 (1992/93), Phase 3 (1995/96), Phase 4 (2000, 2003)*, Phase 5 (2005, 2008)*           | 37,847<br>(5.03)         |
| <b>Ethiopia</b>              | Phase 4 (2000), Phase 5 (2005), Phase 6 (2011)                                               | 14,694<br>(1.95)         |
| <b>Gabon</b>                 | Phase 4 (2000/01), Phase 6 (2012)                                                            | 4,039<br>(0.54)          |
| <b>Ghana</b>                 | Phase 3 (1993/94), Phase 4 (1998/99, 2003), Phase 5 (2008)                                   | 7,067<br>(0.94)          |
| <b>Guatemala</b>             | Phase 3 (1995), Phase 4 (1998/99)                                                            | 8,340<br>(1.11)          |
| <b>Guinea</b>                | Phase 4 (1999), Phase 5 (2005), Phase 6 (2012)                                               | 8,518<br>(1.13)          |
| <b>Guyana</b>                | Phase 5 (2005, 2009)*                                                                        | 1,004<br>(0.13)          |
| <b>Haiti</b>                 | Phase 3 (1994/95), Phase 4 (2000), Phase 5 (2005/06), Phase 6 (2012)                         | 11,927<br>(1.58)         |
| <b>Honduras</b>              | Phase 5 (2005/06), Phase 6 (2011/12)                                                         | 12,725<br>(1.69)         |
| <b>India</b>                 | Phase 4 (1998/99/00), Phase 5 (2005/06)                                                      | 46,435<br>(6.17)         |
| <b>Indonesia</b>             | Phase 2 (1991), Phase 3 (1994, 1997), Phase 4 (2002/03), Phase 5 (2007), Phase 6 (2012)      | 64,890<br>(8.62)         |
| <b>Ivory Coast</b>           | Phase 3 (1994), Phase 4 (1998/99), Phase 5 (2005), Phase 6 (2011/12)                         | 8,020<br>(1.07)          |
| <b>Jordan</b>                | Phase 3 (1997), Phase 5 (2007), Phase 6 (2012)                                               | 13,205<br>(1.75)         |
| <b>Kazakhstan</b>            | Phase 3 (1995, 1999)*                                                                        | 1,454<br>(0.19)          |
| <b>Kenya</b>                 | Phase 2 (1993), Phase 3 (1998), Phase 4 (2003), Phase 5 (2008/09)                            | 9,250<br>(1.23)          |
| <b>Kyrgyz Republic</b>       | Phase 3 (1997), Phase 6 (2012)                                                               | 2,859<br>(0.38)          |
| <b>Lesotho</b>               | Phase 5 (2004/05), Phase 6 (2009/10)                                                         | 4,522<br>(0.60)          |
| <b>Liberia</b>               | Phase 5 (2006/07)                                                                            | 2,229<br>(0.30)          |
| <b>Madagascar</b>            | Phase 2 (1992), Phase 3 (1997), Phase 4 (2003/04), Phase 5 (2008/09)                         | 13,746<br>(1.83)         |
| <b>Malawi</b>                | Phase 4 (2000), Phase 5 (2004/05), Phase 6 (2010)                                            | 20,486<br>(2.72)         |
| <b>Maldives</b>              | Phase 6 (2009)                                                                               | 2,041<br>(0.27)          |

|                              |                                                                                                           |                  |
|------------------------------|-----------------------------------------------------------------------------------------------------------|------------------|
| <b>Mali</b>                  | Phase 3 (1995/96), Phase 4 (2001), Phase 5 (2006)                                                         | 12,855<br>(1.71) |
| <b>Moldova</b>               | Phase 5 (2005)                                                                                            | 1,153<br>(0.15)  |
| <b>Morocco</b>               | Phase 2 (1992), Phase 5 (2003/04)                                                                         | 6,520<br>(0.87)  |
| <b>Mozambique</b>            | Phase 3 (1997), Phase 4 (2003/04), Phase 6 (2011)                                                         | 12,008<br>(1.60) |
| <b>Namibia</b>               | Phase 2 (1992), Phase 4 (2000), Phase 5 (2006/07)                                                         | 5,961<br>(0.79)  |
| <b>Nepal</b>                 | Phase 3 (1996), Phase 4 (2001), Phase 5 (2006), Phase 6 (2011)                                            | 11,688<br>(1.55) |
| <b>Nicaragua</b>             | Phase 3 (1997/98), Phase 4 (2001)                                                                         | 8,658<br>(1.15)  |
| <b>Nigeria</b>               | Phase 2 (1990), Phase 4 (1999, 2003), Phase 5 (2008)                                                      | 17,896<br>(2.38) |
| <b>Niger</b>                 | Phase 2 (1992), Phase 3 (1998), Phase 5 (2006), Phase 6 (2012)                                            | 13,275<br>(1.76) |
| <b>Pakistan</b>              | Phase 2 (1990/91), Phase 5 (2006/07), Phase 6 (2012/13)                                                   | 11,236<br>(1.49) |
| <b>Paraguay</b>              | Phase 2 (1990)                                                                                            | 2,421<br>(0.32)  |
| <b>Peru</b>                  | Phase 2 (1991/92), Phase 3 (1996), Phase 4 (2000), Phase 5 (2005/06, 2007/08, 2009), Phase 6 (2010/11/12) | 57,103<br>(7.59) |
| <b>Philippines</b>           | Phase 3 (1993, 1998)*, Phase 4 (2003), Phase 5 (2008)                                                     | 17,568<br>(2.33) |
| <b>Rwanda</b>                | Phase 2 (1992), Phase 4 (2000), Phase 5 (2005), Phase 6 (2010/11)                                         | 15,041<br>(2.00) |
| <b>Sao Tome and Principe</b> | Phase 5 (2008/09)                                                                                         | 1,072<br>(0.14)  |
| <b>Senegal</b>               | Phase 2 (1992/93), Phase 3 (1997), Phase 4 (2005), Phase 6 (2010/11, 2012/13)*                            | 13,834<br>(1.84) |
| <b>Sierra Leone</b>          | Phase 5 (2008)                                                                                            | 2,202<br>(0.29)  |
| <b>South Africa</b>          | Phase 4 (1998)                                                                                            | 3,075<br>(0.41)  |
| <b>Swaziland</b>             | Phase 5 (2006/07)                                                                                         | 1,396<br>(0.19)  |
| <b>Tanzania</b>              | Phase 2 (1991/2), Phase 3 (1996), Phase 4 (1999), Phase 5 (2004/5, 2007/8)*, Phase 6 (2009/10)            | 16,392<br>(2.18) |
| <b>Timor-Leste</b>           | Phase 6 (2009/10)                                                                                         | 3,612<br>(0.48)  |
| <b>Togo</b>                  | Phase 4 (1998)                                                                                            | 2,196<br>(0.29)  |
| <b>Turkey</b>                | Phase 2 (1993), Phase 4 (1998), Phase 5 (2003/04)                                                         | 7,980<br>(1.06)  |
| <b>Uganda</b>                | Phase 3 (1995), Phase 4 (2000/01), Phase 5 (2006), Phase 6 (2011)                                         | 11,743<br>(1.56) |
| <b>Ukraine</b>               | Phase 5 (2007)                                                                                            | 800<br>(0.11)    |
| <b>Uzbekistan</b>            | Phase 3 (1996)                                                                                            | 768<br>(0.10)    |
| <b>Vietnam</b>               | Phase 4 (1997 / 2002)*                                                                                    | 2,437<br>(0.32)  |
| <b>Yemen</b>                 | Phase 2 (1991/2)                                                                                          | 3,369<br>(0.45)  |
| <b>Zambia</b>                | Phase 2 (1992) Phase 3 (1996/97), Phase 4 (2001/02), Phase 5 (2007)                                       | 12,572<br>(1.67) |
| <b>Zimbabwe</b>              | Phase 3 (1994), Phase 4 (1999), Phase 5 (2005/06), Phase 6 (2010/11)                                      | 9,754<br>(1.30)  |
| <b>TOTAL</b>                 |                                                                                                           | 752,635<br>(100) |

Total numbers and frequencies are based on the neonatal mortality sample. \* indicates that more than one survey was conducted within the phase

Table A2: Covariates across exposure category

| <b>Covariate</b>                                                                                                                                                                                                                             | <b>Mother attended at least 1 ANC visit; % (n=616347)</b> | <b>Mother did not attend ANC visit, % (n=136288)</b> |
|----------------------------------------------------------------------------------------------------------------------------------------------------------------------------------------------------------------------------------------------|-----------------------------------------------------------|------------------------------------------------------|
| <b>Maternal education</b>                                                                                                                                                                                                                    |                                                           |                                                      |
| <i>None</i>                                                                                                                                                                                                                                  | 45.41                                                     | 82.92*                                               |
| <i>Primary or incompl. Secondary</i>                                                                                                                                                                                                         | 33.89                                                     | 13.38*                                               |
| <i>Secondary or higher</i>                                                                                                                                                                                                                   | 20.70                                                     | 3.70*                                                |
|                                                                                                                                                                                                                                              |                                                           |                                                      |
| <b>Maternal age at birth</b>                                                                                                                                                                                                                 |                                                           |                                                      |
| <i>≤ 17 years</i>                                                                                                                                                                                                                            | 3.51                                                      | 4.89*                                                |
| <i>17 - 19 years</i>                                                                                                                                                                                                                         | 12.89                                                     | 12.52*                                               |
| <i>20 - 24 years</i>                                                                                                                                                                                                                         | 28.13                                                     | 25.31*                                               |
| <i>25 - 29 years</i>                                                                                                                                                                                                                         | 24.58                                                     | 22.99*                                               |
| <i>30 years or older</i>                                                                                                                                                                                                                     | 30.88                                                     | 34.29*                                               |
|                                                                                                                                                                                                                                              |                                                           |                                                      |
| <b>Mother is working</b>                                                                                                                                                                                                                     | 57.25                                                     | 51.02*                                               |
|                                                                                                                                                                                                                                              |                                                           |                                                      |
| <b>Mother is HH Head</b>                                                                                                                                                                                                                     | 9.13                                                      | 7.20*                                                |
|                                                                                                                                                                                                                                              |                                                           |                                                      |
| <b>Mother is married</b>                                                                                                                                                                                                                     | 72.24                                                     | 85.77*                                               |
|                                                                                                                                                                                                                                              |                                                           |                                                      |
| <b>Child is female</b>                                                                                                                                                                                                                       | 48.65                                                     | 48.88                                                |
|                                                                                                                                                                                                                                              |                                                           |                                                      |
| <b>Multiple birth</b>                                                                                                                                                                                                                        | 0.91                                                      | 0.10*                                                |
|                                                                                                                                                                                                                                              |                                                           |                                                      |
| <b>Birth order</b>                                                                                                                                                                                                                           |                                                           |                                                      |
| <i>First child</i>                                                                                                                                                                                                                           | 31.23                                                     | 19.41*                                               |
| <i>Second child</i>                                                                                                                                                                                                                          | 21.60                                                     | 16.16*                                               |
| <i>Third child</i>                                                                                                                                                                                                                           | 15.55                                                     | 14.67*                                               |
| <i>Fourth child</i>                                                                                                                                                                                                                          | 10.43                                                     | 12.53*                                               |
| <i>Fifth or later born child</i>                                                                                                                                                                                                             | 21.19                                                     | 37.23*                                               |
|                                                                                                                                                                                                                                              |                                                           |                                                      |
| <b>Birth spacing ≤ 18 mths</b>                                                                                                                                                                                                               | 3.56                                                      | 5.58*                                                |
|                                                                                                                                                                                                                                              |                                                           |                                                      |
| <b>Wealth quintiles</b>                                                                                                                                                                                                                      |                                                           |                                                      |
| <i>First quintile</i>                                                                                                                                                                                                                        | 15.17                                                     | 32.49*                                               |
| <i>Second quintile</i>                                                                                                                                                                                                                       | 17.50                                                     | 26.81*                                               |
| <i>Third quintile</i>                                                                                                                                                                                                                        | 19.88                                                     | 20.39                                                |
| <i>Fourth quintile</i>                                                                                                                                                                                                                       | 22.30                                                     | 13.91*                                               |
| <i>Fifth quintile</i>                                                                                                                                                                                                                        | 25.14                                                     | 6.40*                                                |
| <p><i>N</i> values denote the number of observations in the neonatal mortality sample. Values were population weighted. * Proportions in the two groups were significantly different from each other, <math>p \leq 0.05</math> (t test).</p> |                                                           |                                                      |

Table A3: Associations between mortality outcomes and mediator variables

|                                                             | Neonatal Mortality     |                        | Infant Mortality       |                        |
|-------------------------------------------------------------|------------------------|------------------------|------------------------|------------------------|
|                                                             | (1)                    | (2)                    | (1)                    | (2)                    |
| <i>at least 1 ANC visit</i>                                 | -0.00520***<br>[0.001] | -0.00288***<br>[0.001] | -0.00562***<br>[0.001] | -0.00416***<br>[0.001] |
| <i>at least 4 ANC visits &amp;<br/>skilled ANC provider</i> |                        | -0.00556***<br>[0.001] |                        | -0.00342***<br>[0.001] |
| <i>facility delivery</i>                                    | 0.00211***<br>[0.001]  | 0.00273***<br>[0.001]  | -0.00137*<br>[0.001]   | -0.000999<br>[0.001]   |
| <i>mother had TT injection</i>                              | -0.00856***<br>[0.001] | -0.00814***<br>[0.001] | -0.00619***<br>[0.001] | -0.00594***<br>[0.001] |
| <i>delivery by C-section</i>                                | 0.0101***<br>[0.001]   | 0.0103***<br>[0.001]   | 0.00106<br>[0.001]     | 0.00117<br>[0.001]     |
| <i>child was breastfed</i>                                  |                        |                        | -0.0501***<br>[0.002]  | -0.0501***<br>[0.002]  |
| <i>N</i>                                                    | 689319                 | 689319                 | 522970                 | 522970                 |
| <b>Adjusted for confounding</b>                             | <b>yes</b>             | <b>yes</b>             | <b>yes</b>             | <b>yes</b>             |

All regressions include PSU fixed effects. \*\*\*, \*\* and \* denote significance at the 1%, 5%, and 10% levels, respectively. Std. Errors in square brackets and are clustered at PSU level. Control variables include: Mother's age, marital status and educational achievement, whether she heads the HH, child's sex and birth order and spacing, month of birth, whether it was a multiple birth and HH wealth quintile.

Table A4: Associations between nutritional outcomes and mediator variables

|                                                         | <b>Low Birthweight</b> |                        | <b>Stunting</b>       |                       | <b>Underweight</b>     |                        |
|---------------------------------------------------------|------------------------|------------------------|-----------------------|-----------------------|------------------------|------------------------|
|                                                         | <b>(1)</b>             | <b>(2)</b>             | <b>(1)</b>            | <b>(2)</b>            | <b>(1)</b>             | <b>(2)</b>             |
| <i>at least 1 ANC visit</i>                             | -0.0349***<br>[0.004]  | -0.0168***<br>[0.004]  | -0.0458***<br>[0.003] | -0.0388***<br>[0.003] | -0.0308***<br>[0.002]  | -0.0225***<br>[0.003]  |
| <i>at least 4 ANC visits &amp; skilled ANC provider</i> |                        | -0.0274***<br>[0.002]  |                       | -0.0159***<br>[0.002] |                        | -0.0190***<br>[0.002]  |
| <i>mother had TT injection</i>                          | -0.00721***<br>[0.002] | -0.00532***<br>[0.002] | 0.0000754<br>[0.002]  | 0.000984<br>[0.002]   | -0.00566***<br>[0.002] | -0.00458***<br>[0.002] |
| <i>child was breastfed</i>                              |                        |                        | -0.0264***<br>[0.005] | -0.0264***<br>[0.005] | -0.0154***<br>[0.004]  | -0.0153***<br>[0.004]  |
| <i>child ever got vaccine</i>                           |                        |                        | 0.0539***<br>[0.004]  | 0.0546***<br>[0.004]  | -0.00196<br>[0.003]    | -0.00107<br>[0.003]    |
| <i>N</i>                                                | 380570                 | 380570                 | 475936                | 475936                | 486040                 | 486040                 |
| <b>Adjusted for confounding</b>                         | <b>yes</b>             | <b>yes</b>             | <b>yes</b>            | <b>yes</b>            | <b>yes</b>             | <b>yes</b>             |

All regressions include PSU fixed effects. \*\*\*, \*\* and \* denote significance at the 1%, 5%, and 10% levels, respectively. Std. Errors in square brackets and are clustered at PSU level. Control variables include: Mother's age, marital status and educational achievement, whether she heads the HH, child's sex and birth order and spacing, month of birth, whether it was a multiple birth and HH wealth quintile.

Table A5: Associations between the exposure variables and full set of control variables

|                                                        | <b>Neonatal Mortality</b> | <b>Infant Mortality</b> | <b>Low Birthweight</b> | <b>Stunting</b>        | <b>Underweight</b>    |
|--------------------------------------------------------|---------------------------|-------------------------|------------------------|------------------------|-----------------------|
| <b>Maternal education</b><br>[reference: no education] |                           |                         |                        |                        |                       |
| <i>Primary or incompl. Secondary</i>                   | -0.00247***<br>[0.001]    | -0.00539***<br>[0.001]  | -0.0191***<br>[0.002]  | -0.0447***<br>[0.002]  | -0.0356***<br>[0.002] |
| <i>Secondary or higher</i>                             | -0.00566***<br>[0.001]    | -0.00890***<br>[0.001]  | -0.0350***<br>[0.002]  | -0.0785***<br>[0.003]  | -0.0460***<br>[0.002] |
| <b>Maternal age at birth</b><br>[reference: ≤ 17yrs]   |                           |                         |                        |                        |                       |
| <i>17 - 19 years</i>                                   | -0.00474***<br>[0.001]    | -0.00682***<br>[0.002]  | -0.00926**<br>[0.004]  | -0.0477***<br>[0.005]  | -0.0340***<br>[0.004] |
| <i>20 - 24 years</i>                                   | -0.00735***<br>[0.001]    | -0.0105***<br>[0.002]   | -0.0205***<br>[0.004]  | -0.0714***<br>[0.004]  | -0.0477***<br>[0.004] |
| <i>25 - 29 years</i>                                   | -0.00645***<br>[0.001]    | -0.00963***<br>[0.002]  | -0.0218***<br>[0.004]  | -0.0970***<br>[0.005]  | -0.0545***<br>[0.004] |
| <i>30 years or older</i>                               | -0.000352<br>[0.001]      | -0.00881***<br>[0.002]  | -0.00879**<br>[0.004]  | -0.114***<br>[0.005]   | -0.0567***<br>[0.004] |
| <b>Mother is working</b>                               | 0.00299***<br>[0.000]     | 0.000925<br>[0.001]     | -0.000101<br>[0.001]   | 0.0155***<br>[0.002]   | 0.00591***<br>[0.001] |
| <b>Mother is HH Head</b>                               | -0.000972<br>[0.001]      | -0.0000246<br>[0.001]   | -0.00123<br>[0.002]    | 0.00701**<br>[0.003]   | -0.00259<br>[0.002]   |
| <b>Mother is married</b>                               | -0.00134**<br>[0.001]     | -0.00610***<br>[0.001]  | -0.00988***<br>[0.002] | -0.00849***<br>[0.002] | -0.0106***<br>[0.002] |
| <b>Child is female</b>                                 | -0.00451***<br>[0.000]    | -0.00217***<br>[0.001]  | 0.0208***<br>[0.001]   | -0.0399***<br>[0.001]  | -0.0220***<br>[0.001] |
| <b>Multiple birth</b>                                  | 0.0970***<br>[0.004]      | 0.0607***<br>[0.005]    | 0.391***<br>[0.010]    | 0.155***<br>[0.009]    | 0.148***<br>[0.008]   |
| <b>Birth order</b><br>[reference: First born child]    |                           |                         |                        |                        |                       |
| <i>Second child</i>                                    | -0.00904***<br>[0.001]    | -0.00495***<br>[0.001]  | -0.0265***<br>[0.002]  | 0.0290***<br>[0.002]   | 0.00545***<br>[0.002] |
| <i>Third child</i>                                     | -0.0108***<br>[0.001]     | -0.00429***<br>[0.001]  | -0.0342***<br>[0.002]  | 0.0456***<br>[0.003]   | 0.0137***<br>[0.002]  |
| <i>Fourth child</i>                                    | -0.0118***<br>[0.001]     | -0.00484***<br>[0.001]  | -0.0350***<br>[0.003]  | 0.0574***<br>[0.003]   | 0.0194***<br>[0.003]  |
| <i>Fifth or later born child</i>                       | -0.0115***<br>[0.001]     | -0.00392***<br>[0.001]  | -0.0417***<br>[0.003]  | 0.0835***<br>[0.003]   | 0.0276***<br>[0.003]  |
| <b>Birth spacing ≤ 18 months</b>                       | 0.0218***<br>[0.001]      | 0.0234***<br>[0.002]    | 0.0240***<br>[0.004]   | 0.0462***<br>[0.004]   | 0.0333***<br>[0.003]  |
| <b>Wealth quintiles</b><br>[reference: poorest 20%]    |                           |                         |                        |                        |                       |
| <i>Second quintile</i>                                 | 0.00102<br>[0.001]        | -0.00174*<br>[0.001]    | -0.00848***<br>[0.002] | -0.0172***<br>[0.003]  | -0.0120***<br>[0.002] |
| <i>Third quintile</i>                                  | 0.000917<br>[0.001]       | -0.00246**<br>[0.001]   | -0.0121***<br>[0.003]  | -0.0371***<br>[0.003]  | -0.0302***<br>[0.002] |

|                                                                                                                                                                                                                                                                                                            |                      |                        |                       |                        |                        |
|------------------------------------------------------------------------------------------------------------------------------------------------------------------------------------------------------------------------------------------------------------------------------------------------------------|----------------------|------------------------|-----------------------|------------------------|------------------------|
| <i>Fourth quintile</i>                                                                                                                                                                                                                                                                                     | 0.000564<br>[0.001]  | -0.00496***<br>[0.001] | -0.0170***<br>[0.003] | -0.0602***<br>[0.003]  | -0.0511***<br>[0.003]  |
| <i>Fifth quintile</i>                                                                                                                                                                                                                                                                                      | 0.0000414<br>[0.001] | -0.00619***<br>[0.001] | -0.0206***<br>[0.003] | -0.0977***<br>[0.003]  | -0.0790***<br>[0.003]  |
| <b>Month of birth</b>                                                                                                                                                                                                                                                                                      | 0.0000126<br>[0.000] | -0.0000336<br>[0.000]  | -0.000283*<br>[0.000] | -0.00372***<br>[0.000] | -0.00290***<br>[0.000] |
| <b>N</b>                                                                                                                                                                                                                                                                                                   | <b>752635</b>        | <b>574675</b>          | <b>400426</b>         | <b>501484</b>          | <b>512424</b>          |
| Results are from the main results regressions of table 2 & 3 (model 3) and are adjusted for the full set of control variables and include PSU fixed effects. ***, ** and * denote significance at the 1%, 5%, and 10% levels, respectively. Std. Errors in square brackets and are clustered at PSU level. |                      |                        |                       |                        |                        |

Table A6: Associations between the exposure variables before and after the introduction of the WHO recommendation (Year 2002)

| Neonatal Mortality                                      | Before 2002 (1990-2002) |                       |                        | After 2002 (2003-2013) |                        |                        |
|---------------------------------------------------------|-------------------------|-----------------------|------------------------|------------------------|------------------------|------------------------|
|                                                         | (1)                     | (2)                   | (3)                    | (1)                    | (2)                    | (3)                    |
| <i>at least 1 ANC visit</i>                             | -0.0130***<br>[0.001]   | -0.0129***<br>[0.001] | -0.00983***<br>[0.001] | -0.00798***<br>[0.001] | -0.00755***<br>[0.001] | -0.00534***<br>[0.001] |
| <i>at least 4 ANC visits &amp; skilled ANC provider</i> |                         |                       | -0.00702***<br>[0.001] |                        |                        | -0.00453***<br>[0.001] |
| <i>N</i>                                                | 320338                  | 320338                | 320338                 | 432297                 | 432297                 | 432297                 |
| Infant Mortality                                        | Before 2002 (1990-2002) |                       |                        | After 2002 (2003-2013) |                        |                        |
|                                                         | (1)                     | (2)                   | (3)                    | (1)                    | (2)                    | (3)                    |
| <i>at least 1 ANC visit</i>                             | -0.0152***<br>[0.001]   | -0.0126***<br>[0.001] | -0.00936***<br>[0.002] | -0.00987***<br>[0.001] | -0.00827***<br>[0.001] | -0.00733***<br>[0.001] |
| <i>at least 4 ANC visits &amp; skilled ANC provider</i> |                         |                       | -0.00730***<br>[0.001] |                        |                        | -0.00189**<br>[0.001]  |
| <i>N</i>                                                | 244729                  | 244729                | 244729                 | 329946                 | 329946                 | 329946                 |
| Low Birthweight                                         | Before 2002 (1990-2002) |                       |                        | After 2002 (2003-2013) |                        |                        |
|                                                         | (1)                     | (2)                   | (3)                    | (1)                    | (2)                    | (3)                    |
| <i>at least 1 ANC visit</i>                             | -0.0404***<br>[0.005]   | -0.0352***<br>[0.005] | -0.0181***<br>[0.006]  | -0.0455***<br>[0.006]  | -0.0416***<br>[0.006]  | -0.0202***<br>[0.006]  |
| <i>at least 4 ANC visits &amp; skilled ANC provider</i> |                         |                       | -0.0259***<br>[0.003]  |                        |                        | -0.0299***<br>[0.002]  |
| <i>N</i>                                                | 145426                  | 145426                | 145426                 | 255000                 | 255000                 | 255000                 |
| Stunting                                                | Before 2002 (1990-2002) |                       |                        | After 2002 (2003-2013) |                        |                        |
|                                                         | (1)                     | (2)                   | (3)                    | (1)                    | (2)                    | (3)                    |
| <i>at least 1 ANC visit</i>                             | -0.0753***<br>[0.004]   | -0.0416***<br>[0.004] | -0.0333***<br>[0.004]  | -0.0586***<br>[0.004]  | -0.0383***<br>[0.004]  | -0.0335***<br>[0.004]  |
| <i>at least 4 ANC visits &amp; skilled ANC provider</i> |                         |                       | -0.0187***<br>[0.003]  |                        |                        | -0.00964***<br>[0.003] |
| <i>N</i>                                                | 217791                  | 217791                | 217791                 | 283693                 | 283693                 | 283693                 |
| Underweight                                             | Before 2002 (1990-2002) |                       |                        | After 2002 (2003-2013) |                        |                        |
|                                                         | (1)                     | (2)                   | (3)                    | (1)                    | (2)                    | (3)                    |
| <i>at least 1 ANC visit</i>                             | -0.0534***<br>[0.003]   | -0.0299***<br>[0.003] | -0.0204***<br>[0.003]  | -0.0463***<br>[0.003]  | -0.0338***<br>[0.003]  | -0.0257***<br>[0.004]  |
| <i>at least 4 ANC visits &amp; skilled ANC provider</i> |                         |                       | -0.0214***<br>[0.003]  |                        |                        | -0.0163***<br>[0.002]  |
| <i>N</i>                                                | 223491                  | 223491                | 223491                 | 288933                 | 288933                 | 288933                 |



|                                 |    |     |     |    |     |     |
|---------------------------------|----|-----|-----|----|-----|-----|
| <i>Adjusted for confounding</i> | no | yes | yes | no | yes | yes |
|---------------------------------|----|-----|-----|----|-----|-----|

All regressions include PSU fixed effects. \*\*\*, \*\* and \* denote significance at the 1%, 5%, and 10% levels, respectively. Std. Errors in square brackets and are clustered at PSU level. Control variables include: Mother's age, marital status and educational achievement, whether she heads the HH, child's sex and birth order and spacing, month of birth, whether it was a multiple birth and HH wealth quintile.

Figure A1: Associations between mortality outcomes and ANC attendance by world region

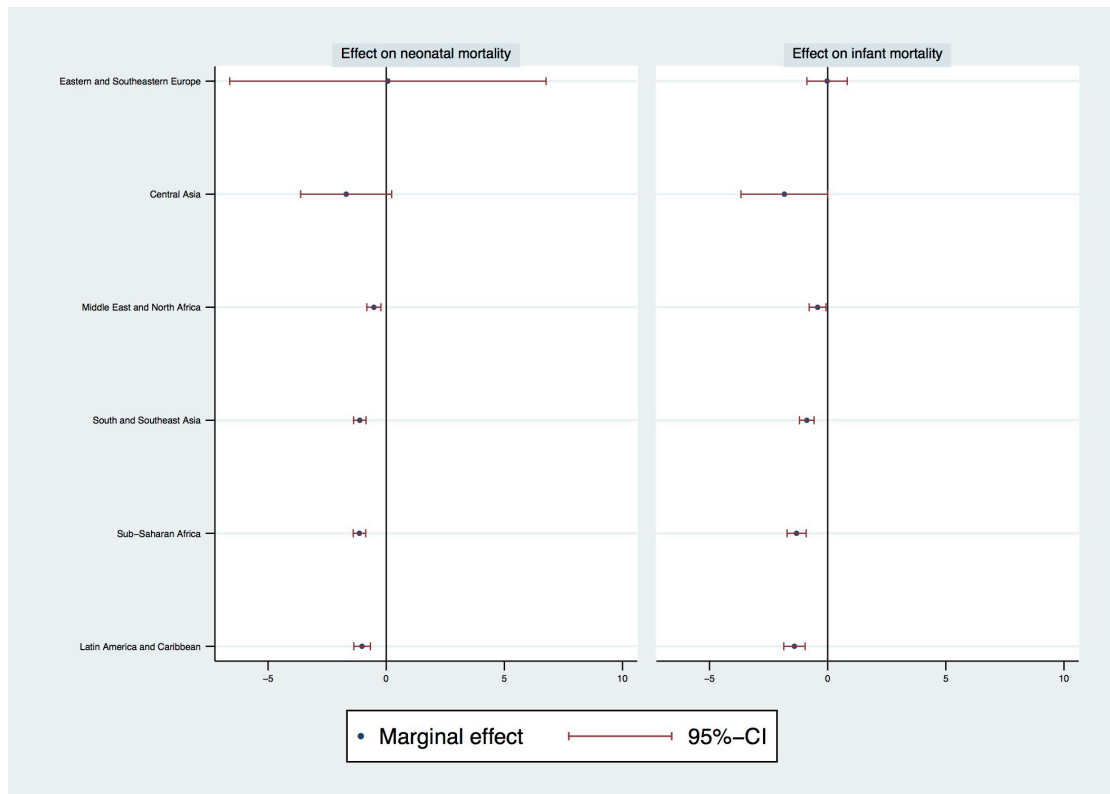

Figures show marginal effects and 95% confidence intervals for binary indicator that the mother attended at least one ANC visit (region-wise regressions). The estimated model corresponds to the specification (2) from table 2 & 3. All regressions include PSU fixed effects and the full set of covariates.

Figure A2: Associations between nutritional outcomes and ANC attendance by world region

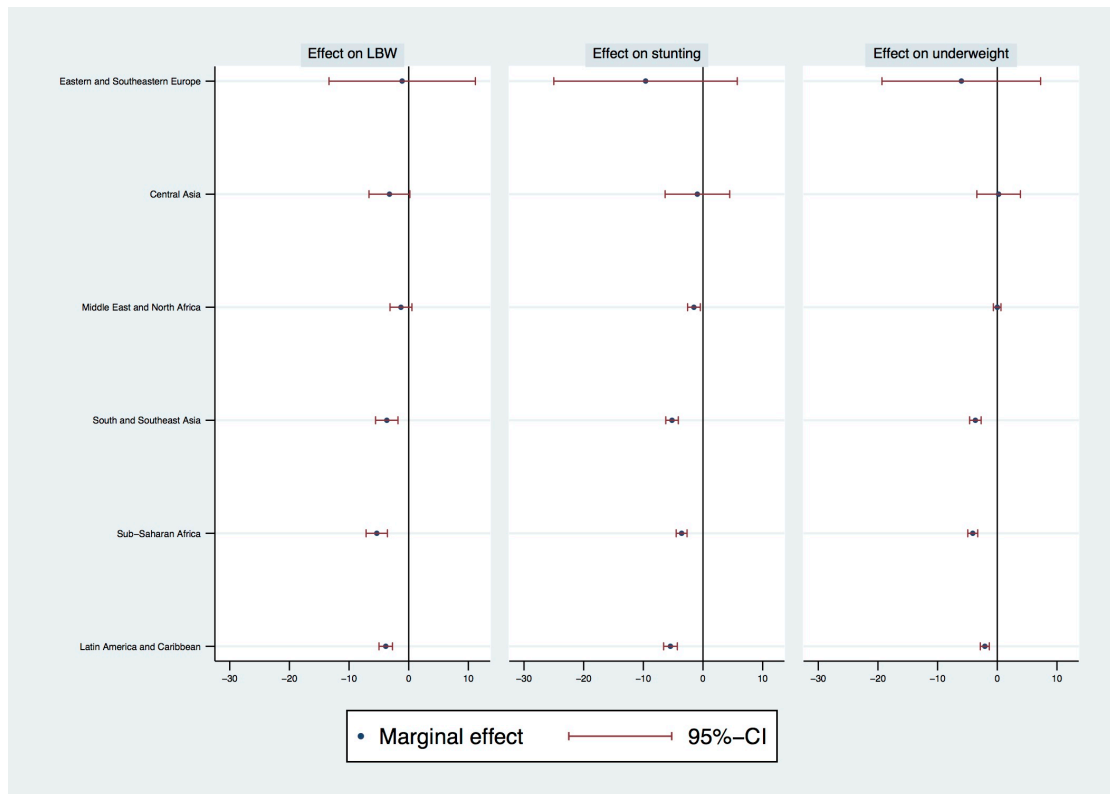

Figures show marginal effects and 95% confidence intervals for binary indicator that the mother attended at least one ANC visit (region-wise regressions). The estimated model corresponds to the specification (2) from table 2 & 3. All regressions include PSU fixed effects and the full set of covariates.
